# Supplementary material
Source: PubMed Central journal article supplement (PMC4914628)
Supplement: AAC.00358-16_zac007165268so1.pdf [file AAC.00358-16_zac007165268so1.pdf]

Table S1 - Plasmids and Primers used in this study

| Plasmids                             | Description                                             | Reference  |
|--------------------------------------|---------------------------------------------------------|------------|
| <i>pKOR1</i>                         | empty plasmid for allelic replacement                   | 1          |
| <i>pKOR1+pbp4</i>                    | <i>pKOR1</i> deletion construct for <i>pbp4</i> gene    | This study |
| <i>pTX<sub>Δ</sub></i>               | empty plasmid for constitutive expression               | 2          |
| <i>pTX<sub>Δ</sub>+pbp4</i> (SF8300) | constitutively expressed <i>pbp4</i> from SF8300 strain | This study |
| <i>pTX<sub>Δ</sub>+pbp4</i> (SRB)    | constitutively expressed <i>pbp4</i> from SRB strain    | This study |
| <i>pTX<sub>Δ</sub>+pbp4</i> (SRT)    | constitutively expressed <i>pbp4</i> from SRT strain    | This study |

  

| Primers                  | Sequence (5'-3')                                                                    | Use                                           |
|--------------------------|-------------------------------------------------------------------------------------|-----------------------------------------------|
| PBP4-P1                  | GGGGACAAGTTTGTACAAAAAAGCAGGCTAGTTTGAATTTGACATTGTGACTTGTGCGATATCTTTGCATAATACGACC     | <i>pbp4</i> deletion                          |
| PBP4-P2                  | AAAGCGTTAATCTTCCCTTTTCCAATTCTTAAATATTCCTAAAAAGC                                     | <i>pbp4</i> deletion                          |
| PBP4-P3                  | AAAAGGGAAGATTAACGCTTAACTACTAAAAACGGACAAGTTGCACATTATAAAGCTGCGAAACTTGTCCG             | <i>pbp4</i> deletion                          |
| PBP4-P4                  | GGGGACCACTTTGTACAAGAAAGCTGGGTGAAGATTTTAAATAGATATATCACAGAAATTATGAAAAATAAGACAACG      | <i>pbp4</i> deletion                          |
| PBP4- <i>Bam</i> H1 -for | TAAGGATCCGAAAAGGGAAGATTAACGCTTTATGAAAAATTTAATATC                                    | <i>pbp4</i> cloning in <i>pTX<sub>Δ</sub></i> |
| PBP4- <i>Mlu</i> 1 -rev  | TAACACGCGTTATTATAAAATAAATATAAAACGGACAAG                                             | <i>pbp4</i> cloning in <i>pTX<sub>Δ</sub></i> |
| PBP4 pt. mut P1          | GGGGACAAGTTTGTACAAAAAAGCAGGCGAGTAAGTTTGCTCTTCGTACAACATTATAACACCTTTAGCTACACAG        | <i>pbp4</i> point mutation                    |
| PBP4 E183A mut 1         | TACACATTTTCGTCAATCCAACGGGTGCTGCAAATTCAGATTACGTACATTTGCACC                           | <i>pbp4</i> point mutation                    |
| PBP4 E183A mut 2         | TCTTGAATTTGCAGCACCCGTTGGATTGACGAAATGTGTATTTTTCATTC                                  | <i>pbp4</i> point mutation                    |
| PBP4 F241R mut 1         | ACGTATTACACACGCAACTTTTTCATTGGAAGGTGCAAAAATGAGTTTGC                                  | <i>pbp4</i> point mutation                    |
| PBP4 F241R mut 2         | TTCCAATGAAAAGTTGCGTGTGTAATACGTAACGTCATGCGTTTGGTG                                    | <i>pbp4</i> point mutation                    |
| PBP4 pt. mut P2          | GGGGACCACTTTGTACAAGAAAGCTGGGTAGAAGGCATTTTCGACGACTAAAATCAAACAAGAATTATATGGTAAAGATGC   | <i>pbp4</i> point mutation                    |
| <i>AcrB</i> pt. mut P1   | GGGGACAAGTTTGTACAAAAAAGCAGGCAGAAAATGGTATTTCTGCAAGTCAACTTGAATGCACTTGAATGAAAACCTACCAG | <i>acrB</i> point mutation                    |
| <i>AcrB</i> I960V mut 1  | TAGTAACAAATGCCGTTGTGTTAATAGACCGTGTATTATAATAATG                                      | <i>acrB</i> point mutation                    |
| <i>AcrB</i> I960V mut 2  | TAACACGGTCTATTAACACAACGGCATTGTTACTACGATTCC                                          | <i>acrB</i> point mutation                    |
| <i>AcrB</i> pt. mut P2   | GGGGACCACTTTGTACAAGAAAGCTGGGTGATATAAAGTAGTCAATATCATGACCGCTTTTATGGCTTTTATATTATCTATCG | <i>acrB</i> point mutation                    |
| <i>GdpP</i> pt. mut P1   | GGGGACAAGTTTGTACAAAAAAGCAGGCATCGATTTAAGTTTGAATTTGAAGCGAATCATGAAAAATAATTCTAAAAAGTG   | <i>gdpP</i> point mutation                    |
| <i>GdpP</i> N182K mut 1  | ACATTATTTTATAGATAAATACGATGAGATTACGCAAAATATGAATG                                     | <i>gdpP</i> point mutation                    |
| <i>GdpP</i> N182K mut 2  | TTGCGTAATCTCATCGTATTTATCTAAAAATAATGTCGCAATG                                         | <i>gdpP</i> point mutation                    |
| <i>GdpP</i> pt. mut P2   | GGGGACCACTTTGTACAAGAAAGCTGGGTATGCTTCTAAATTATTCATCATTGCAAATCTAGACACACCGATTGCTGCACC   | <i>gdpP</i> point mutation                    |

**Figure S1**

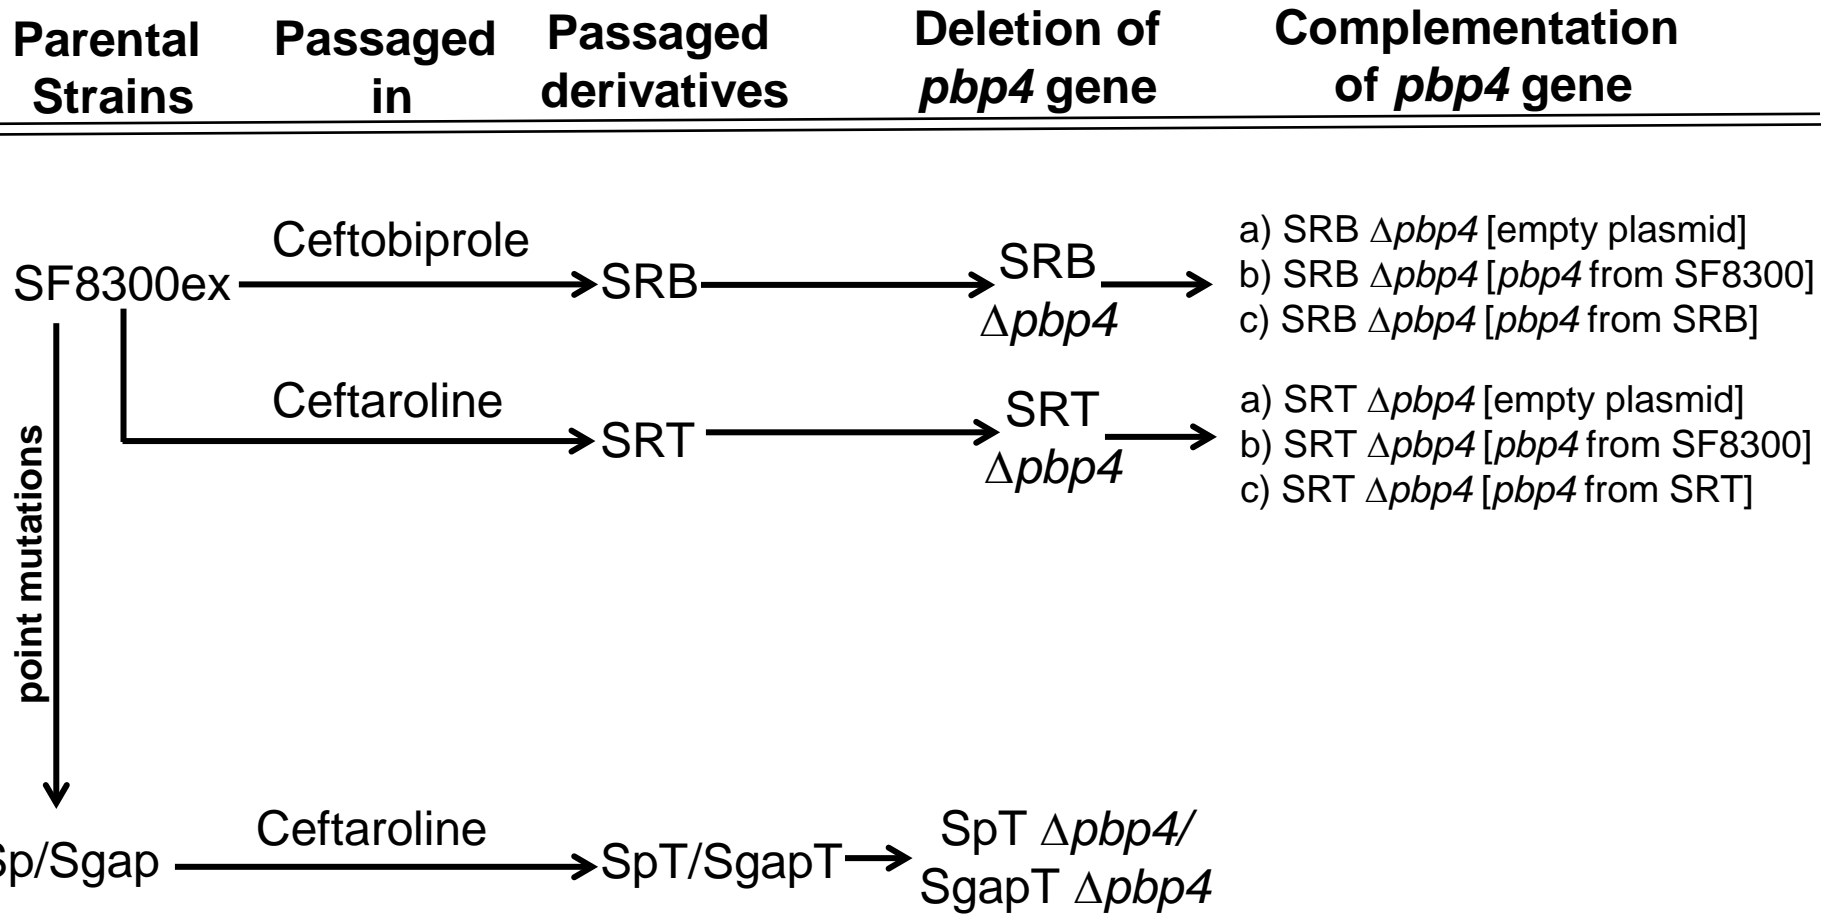

**Figure S1:** Scheme of passaging experiments against new generation cephalosporins.

## References

1. **Bae T, Schneewind O.** 2006. Allelic replacement in *Staphylococcus aureus* with inducible counter-selection. *Plasmid* **55**:58-63.
2. **Wang R, Braughton KR, Kretschmer D, Bach TH, Queck SY, Li M, Kennedy AD, Dorward DW, Klebanoff SJ, Peschel A, DeLeo FR, Otto M.** 2007. Identification of novel cytolytic peptides as key virulence determinants for community-associated MRSA. *Nat Med* **13**:1510-1514.
